# Supplementary material for: Design and synthesis of metal hydroxide three-dimensional inorganic cationic frameworks
Source: Royal Society of Chemistry journal article supplement (doi:10.1039/c8dt00039e), 2018-01-01
Supplement: c8dt00039e1.pdf [file c8dt00039e1.pdf]

Electronic Supplementary Information for

## **Design and Synthesis of Metal Hydroxide Three-Dimensional Inorganic Cationic Framework**

Long Yuan<sup>a</sup>, Keke Huang<sup>a</sup>, Wenchun Feng<sup>b</sup>, Baiyan Li<sup>c</sup>, Changmin Hou<sup>a</sup>, Kaiqi Ye<sup>d</sup>,  
Xiaofeng Wu<sup>a</sup>, Zhan Shi<sup>a</sup>, Shan Wang<sup>e</sup> and Shouhua Feng<sup>a\*</sup>

<sup>a</sup> State Key Laboratory of Inorganic Synthesis and Preparative Chemistry, College of Chemistry, Jilin University, Changchun, 130012, China

<sup>b</sup> Department of Chemical Engineering, University of Michigan, Ann Arbor, Michigan 48109-2136, United States

<sup>c</sup> Department of Chemistry, University of South Florida, 4202 E. Fowler Avenue, Tampa, Florida 33620, United States

<sup>d</sup> State Key Laboratory of Supramolecular Structure and Materials, Jilin University, Changchun 130012, China

<sup>e</sup> Department of Materials Science and Engineering, Jilin Institute of Chemical Technology, Jilin 132022, China

\*email: shfeng@jlu.edu.cn (S.F.)

**Table S1.** Crystal data and results of the structure refinement of Dy,Fe,Cr-3D-ICF

|                                              |                                                                                            |
|----------------------------------------------|--------------------------------------------------------------------------------------------|
| Identification code                          | Dy,Fe,Cr-3D-ICF                                                                            |
| Formula                                      | Dy <sub>14.34</sub> FeCr <sub>0.66</sub> O <sub>42</sub> H <sub>42</sub> NaCl <sub>6</sub> |
| Formula weight/gmol <sup>-1</sup>            | 3369.89                                                                                    |
| Temperature/K                                | 293(2)                                                                                     |
| Crystal size/mm <sup>3</sup>                 | 0.02×0.02×0.02                                                                             |
| Lattice parameter/Å                          | a=b=c=13.2181(1)                                                                           |
| Cell volume/Å <sup>3</sup>                   | 2309.44(3)                                                                                 |
| Crystal system                               | cubic                                                                                      |
| Space group                                  | Im-3 (229)                                                                                 |
| $\rho_{\text{calcd.}}/\text{Mgm}^{-3}$       | 4.846                                                                                      |
| Z                                            | 2                                                                                          |
| F(000)                                       | 2958                                                                                       |
| $\lambda/\text{Å}$                           | 0.71073                                                                                    |
| Reflections (independent)                    | 5737 (558)                                                                                 |
| Theta range for data collection/deg.         | 3.08 to 29.04                                                                              |
| Limiting indices                             | -17<=h<=17, -17<=k<=16, -16<=l<=16                                                         |
| Completeness to theta=29.04                  | 94.7 %                                                                                     |
| Max. and min. transmission                   | 0.6478 and 0.6478                                                                          |
| Refinement method                            | Full-matrix least-squares on F <sup>2</sup>                                                |
| Data/Restraints/Parameters                   | 558/1/36                                                                                   |
| Weighting scheme                             |                                                                                            |
| R <sub>1</sub> [I > 2σ(I)]                   | 0.0434                                                                                     |
| R <sub>1</sub> (all)                         | 0.0500                                                                                     |
| wR <sub>2</sub> [I > 2σ(I)]                  | 0.0867                                                                                     |
| wR <sub>2</sub> (all)                        | 0.0895                                                                                     |
| GooF (all)                                   | 1.020                                                                                      |
| Largest diff. peak and hole/eÅ <sup>-3</sup> | 4.129 and -5.763                                                                           |

**Table S2.** Atomic sites and equivalent isotropic displacement parameters of Dy,Fe,Cr-3D-ICF.

| Atom  | Wyck | Site  | x/a    | y/b    | z/c     | U(eq)[Å <sup>2</sup> ]* |
|-------|------|-------|--------|--------|---------|-------------------------|
| Dy(1) | 24g  | m..   | 0.3538 | 0.3314 | 0       | 0.010                   |
| Cr(1) | 8c   | .-3.  | 0.2500 | 0.2500 | 0.2500  | 0.058                   |
| Fe(1) | 8c   | .-3.  | 0.2500 | 0.2500 | 0.2500  | 0.058                   |
| Dy(2) | 8c   | .-3.  | 0.2500 | 0.2500 | 0.2500  | 0.058                   |
| O(1)  | 24g  | m..   | 0.1885 | 0.3973 | 0       | 0.012                   |
| O(2)  | 12e  | mm2.. | 0.3903 | 0.5000 | 0       | 0.039                   |
| O(3)  | 48h  | 1     | 0.1995 | 0.1104 | 0.3151  | 0.030                   |
| Cl(1) | 12d  | mm2.. | 0.5000 | 0.5000 | -0.2633 | 0.030                   |
| Na(1) | 2a   | m-3   | 0.5000 | 0.5000 | -0.5000 | 0.022                   |
| H(1)  | 24g  | m..   | 0.1426 | 0.3424 | 0       | 0.015                   |
| H(2)  | 24g  | m..   | 0.4575 | 0.5000 | 0.467   | 0.047                   |
| H(3)  | 48h  | 1     | 0.1389 | 0.0739 | 0.2910  | 0.036                   |

\*U(eq) is defined as one third of the trace of the orthogonalized U<sub>ij</sub> tensor.

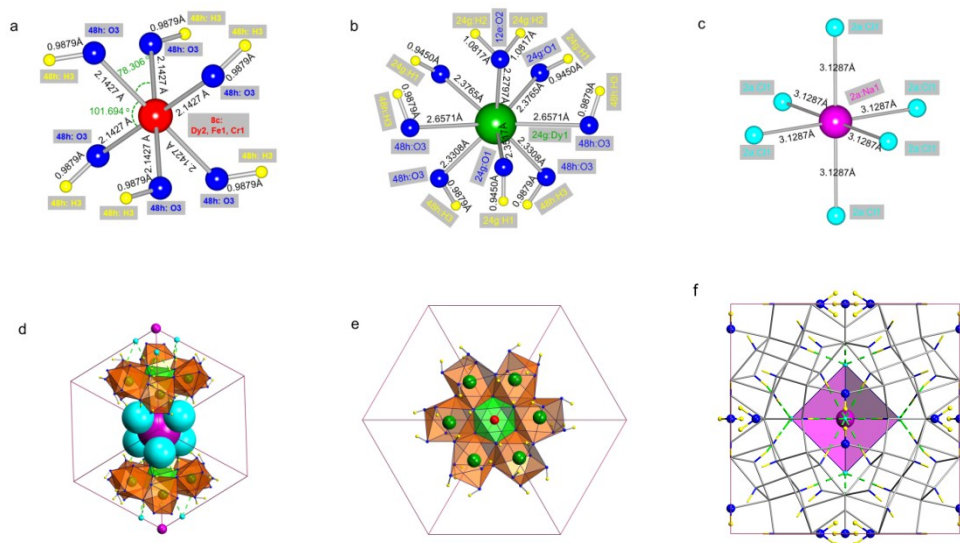

**Fig. S1.** Building blocks and local structure of Dy,Fe,Cr-3D-ICF. **a**, Coordination of octahedral site with the group of  $(\text{Dy}_{0.58}, \text{Fe}_{0.25}, \text{Cr}_{0.17})(\text{OH})_6$ . **b**, Coordination of rare-earth site polyhedral group of  $\text{Dy}(\text{OH})_8$ . **c**, Body-centered site of  $\text{NaCl}_6$  anionic group. **d**, Similarity to layered double hydroxide in partial structure of Dy,Fe,Cr-3D-ICF. Hydrogen bond of  $\text{O}-\text{H}\cdots\text{Cl}$  is presented as green segmented lines, space-filling atoms of Na (pink) and Cl (cyan) is presented to show the anion occupancy in the cage. **e**, Edge-sharing  $\text{Dy}(\text{OH})_8$  polyhedrons and  $(\text{Dy}_{0.58}, \text{Fe}_{0.25}, \text{Cr}_{0.17})(\text{OH})_6$  octahedrons, yellow H atoms linked with O are pointed to the inside of cage. **f**, Unit cell structure of Dy,Fe,Cr-3D-ICF view from  $\langle 001 \rangle$  direction.

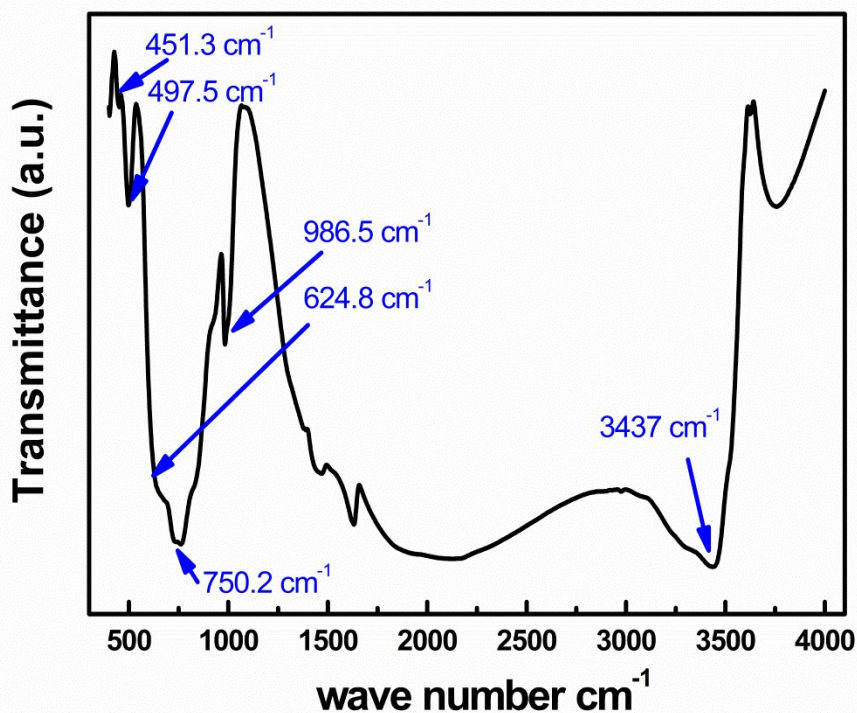

**Fig. S2.** Room temperature Fourier transform infrared spectroscopy (FT-IR) of Dy,Fe,Cr-3D-ICF.

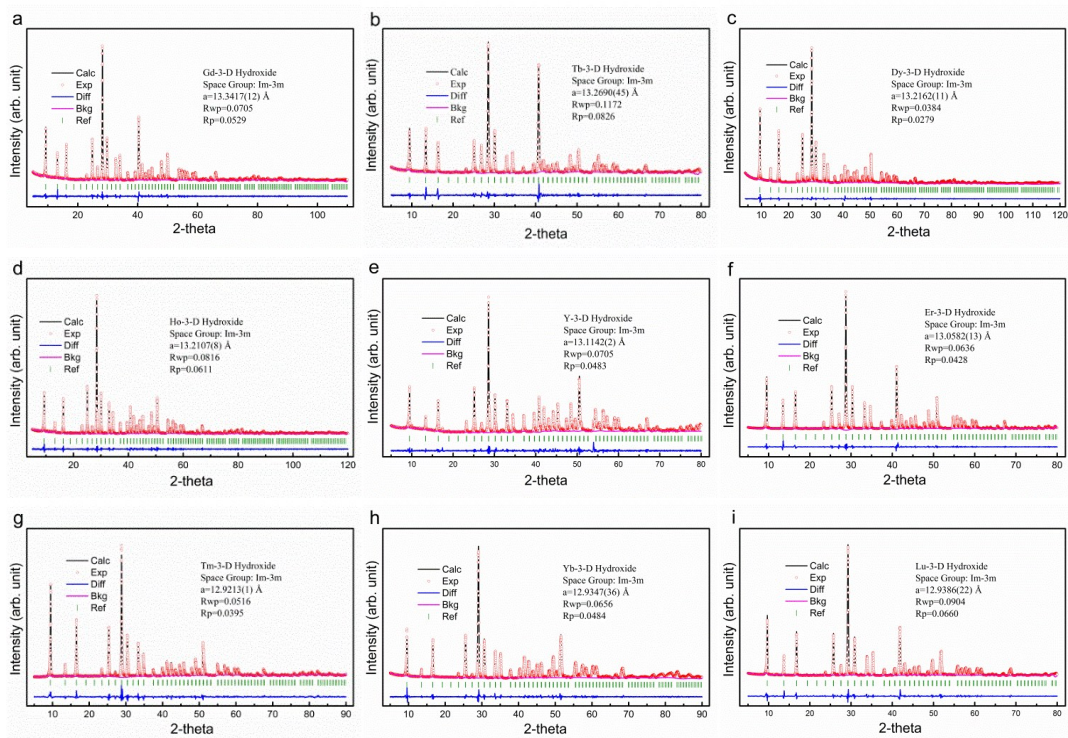

**Fig. S3.** PXRD results and Pawley refinement of lattice parameters of 3D-ICFs. a, Gd,Fe,Cr-3D-ICF; b, Tb,Fe,Cr-3D-ICF; c, Dy,Fe,Cr-3D-ICF; d, Ho,Fe,Cr-3D-ICF; e, Y,Fe,Cr-3D-ICF; f, Er,Fe,Cr-3D-ICF, g, Tm,Fe,Cr-3D-ICF; h, Yb,Fe,Cr-3D-ICF; i, Lu,Fe,Cr-3D-ICF.

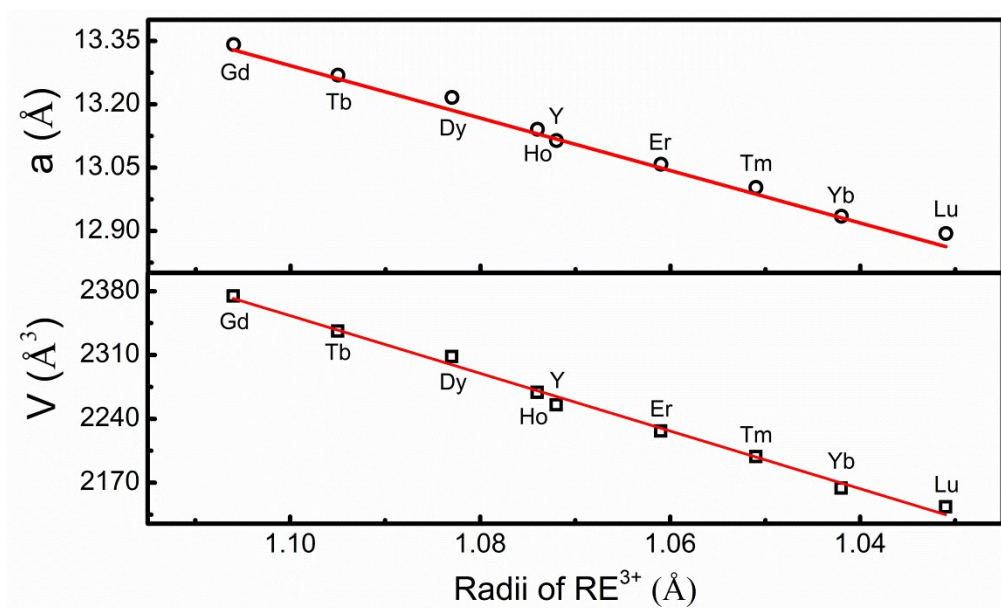

**Fig. S4.** Variation of lattice parameter (a) and cell volume (V) with effective ionic radii of RE,Fe,Cr-3D-ICFs. Red lines are linear fit to the data.

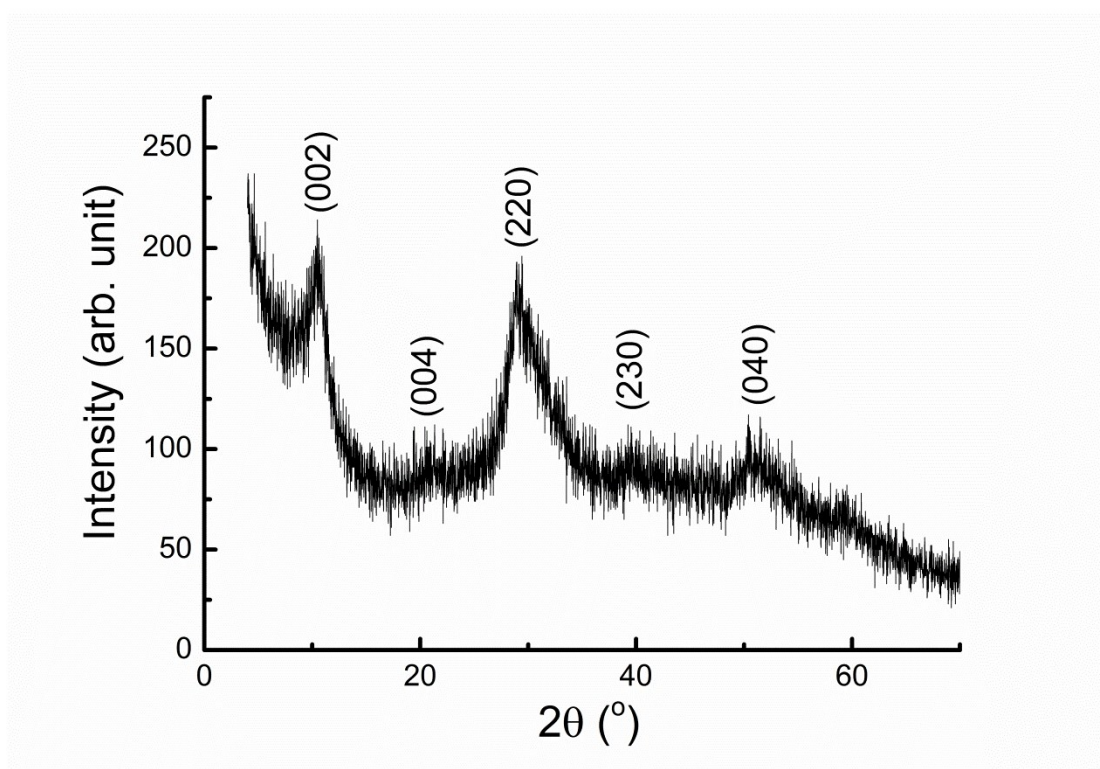

Fig. S5. PXRD of Cr-modified LDyH precursor.

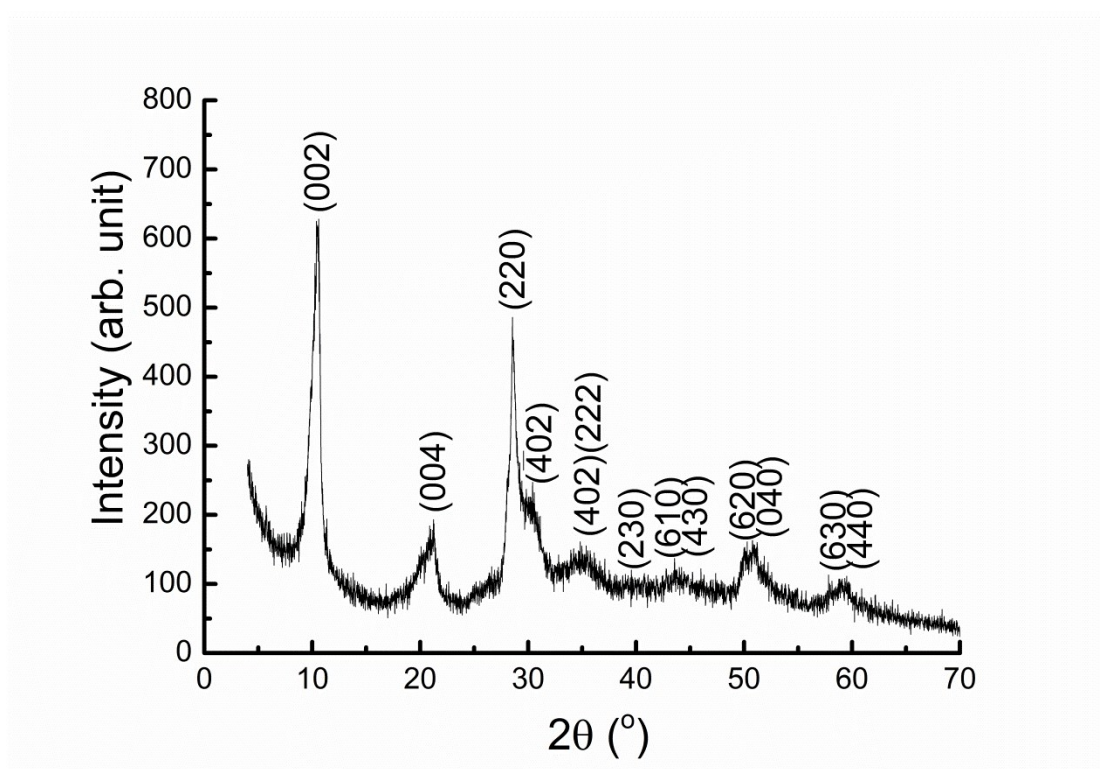

Fig. S6. PXRD of Fe-modified LDyH precursor.

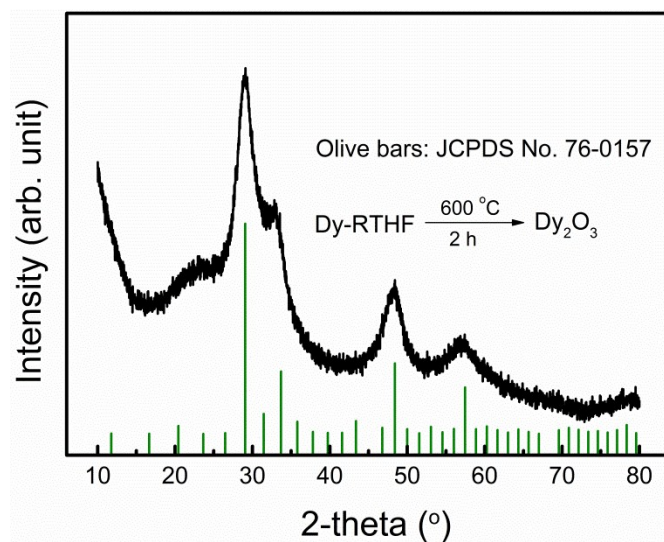

**Fig. S7.** PXRD of thermal decomposition product of Dy,Fe,Cr-3D-ICF. Vertical olive bars are peak position and intensity of the resulted  $\text{Dy}_2\text{O}_3$  phase.

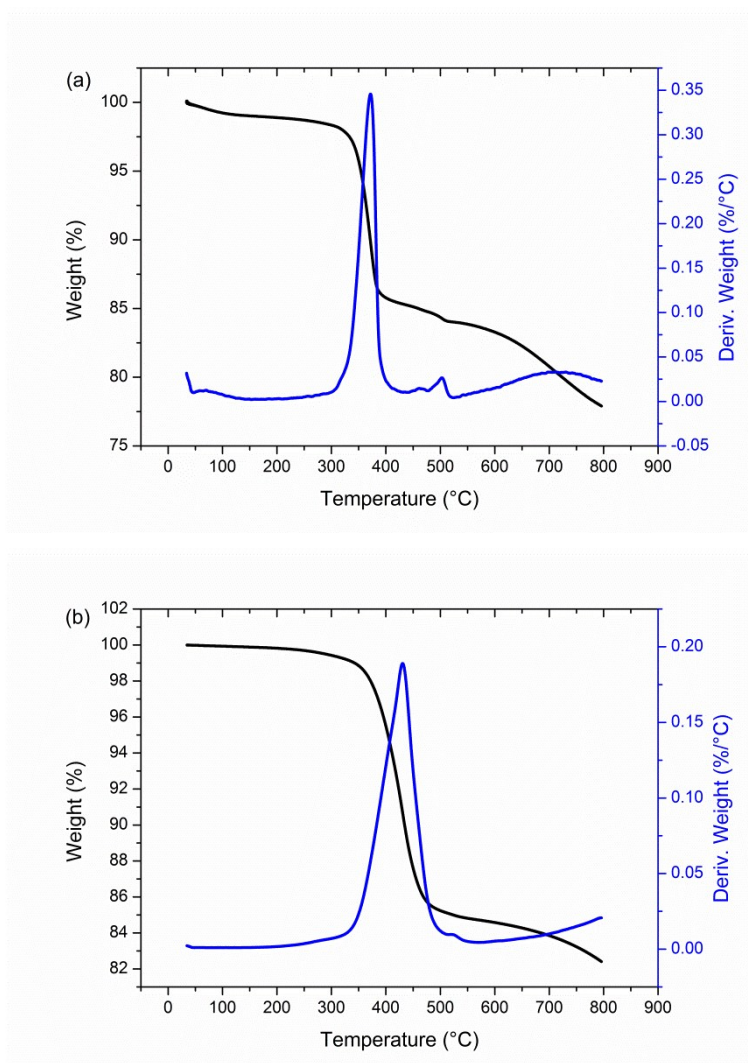

**Fig. S8.** TG-DTA results of (a) Tb,Fe,Cr-3D-ICF and (b) Y,Fe,Cr-3D-ICF.

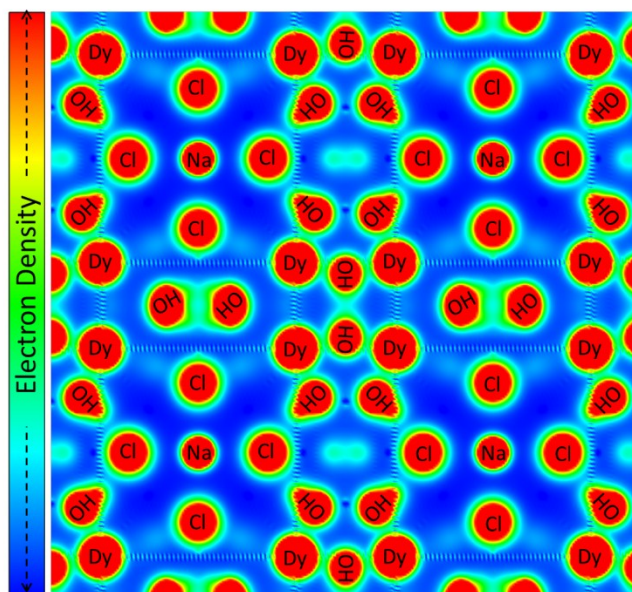

**Fig. S9.** Electron density map of {001} plane of Dy,Fe,Cr-3D-ICF visualized with VESTA 3 program.

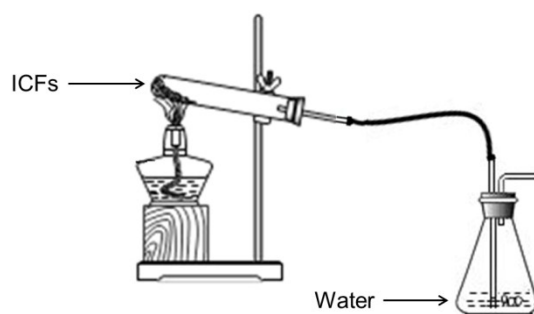

**Fig. S10.** HCl collecting device for thermal decomposition of 3D-ICFs.

Table S3. Amounts of HCl (gas molecule) storage in RE,Fe,Cr-3D-ICFs.

| Sample Name     | HCl production (experimental)/mL·g <sup>-1</sup> | HCl production (calculation)/mL·g <sup>-1</sup> |
|-----------------|--------------------------------------------------|-------------------------------------------------|
| Gd,Fe,Cr-3D-ICF | 40.65                                            | 40.80                                           |
| Tb,Fe,Cr-3D-ICF | 40.39                                            | 40.50                                           |
| Dy,Fe,Cr-3D-ICF | 39.50                                            | 39.89                                           |
| Ho,Fe,Cr-3D-ICF | 39.27                                            | 39.48                                           |
| Er,Fe,Cr-3D-ICF | 38.94                                            | 39.09                                           |
| Tm,Fe,Cr-3D-ICF | 38.80                                            | 38.82                                           |
| Yb,Fe,Cr-3D-ICF | 37.92                                            | 38.17                                           |
| Lu,Fe,Cr-3D-ICF | 37.69                                            | 37.88                                           |
| Y,Fe,Cr-3D-ICF  | 57.99                                            | 58.06                                           |



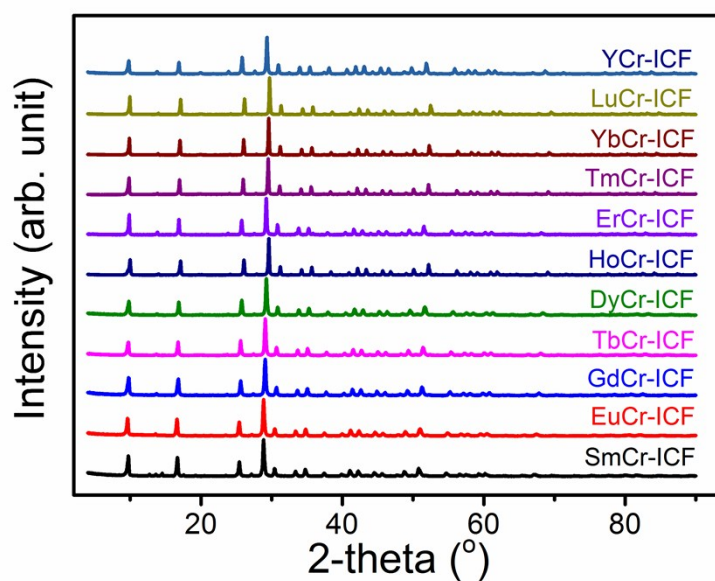

Fig. S11. Powder x-ray diffraction results of RE,Cr-3D-ICFs.

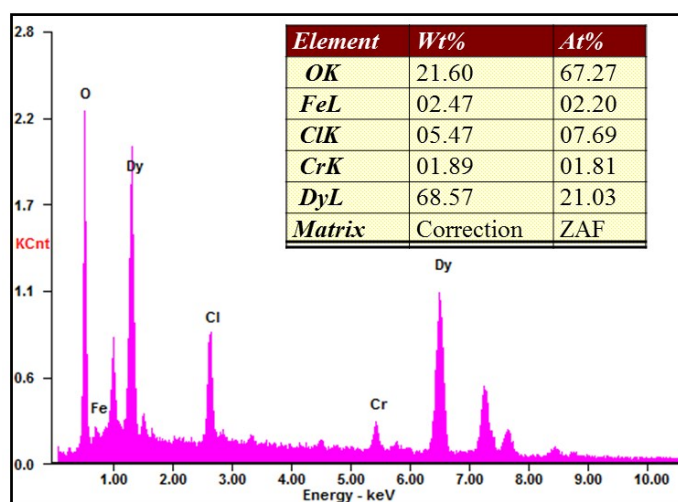

Fig. S12. Typical EDS result of Dy,Fe,Cr-3D-ICF single crystal.
